# Supplementary material for: Cation–anion interaction-directed formation of functional vesicles and their biological application for nucleus-specific imaging
Source: Royal Society of Chemistry journal article supplement (doi:10.1039/c8nj01503a), 2018-01-01

***Supporting Information***

***Cation–anion interaction directed formation of functional vesicles and their biological application for nucleus-specific imaging***

Qunshou Kong, Weihua Zhuang, Gaocan Li,\* Qing Jiang\* and Yunbing Wang

National Engineering Research Center for Biomaterials, Sichuan University, 29  
Wangjiang Road, Chengdu 610064, China

E-mail: gaocanli@scu.edu.cn; jiangq@scu.edu.cn

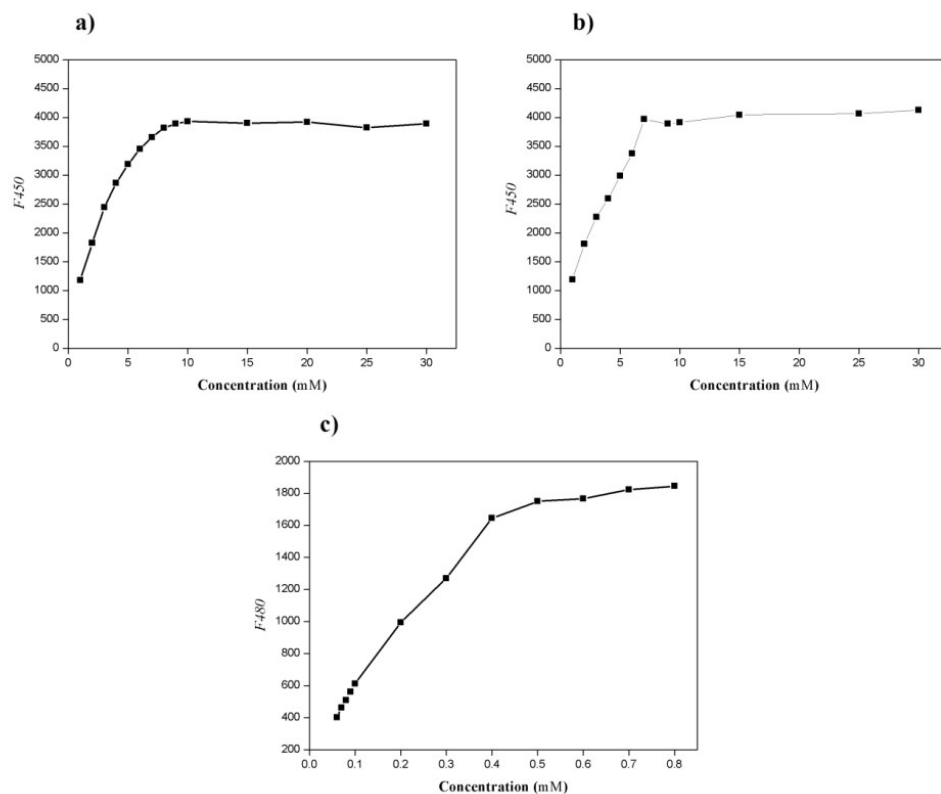

**Fig. S1** Critical vesicle concentrations (CVC) of functional imidazolium salts: a) TPAI-C6; b) TPAI-C8; and c) TPEI-C8.

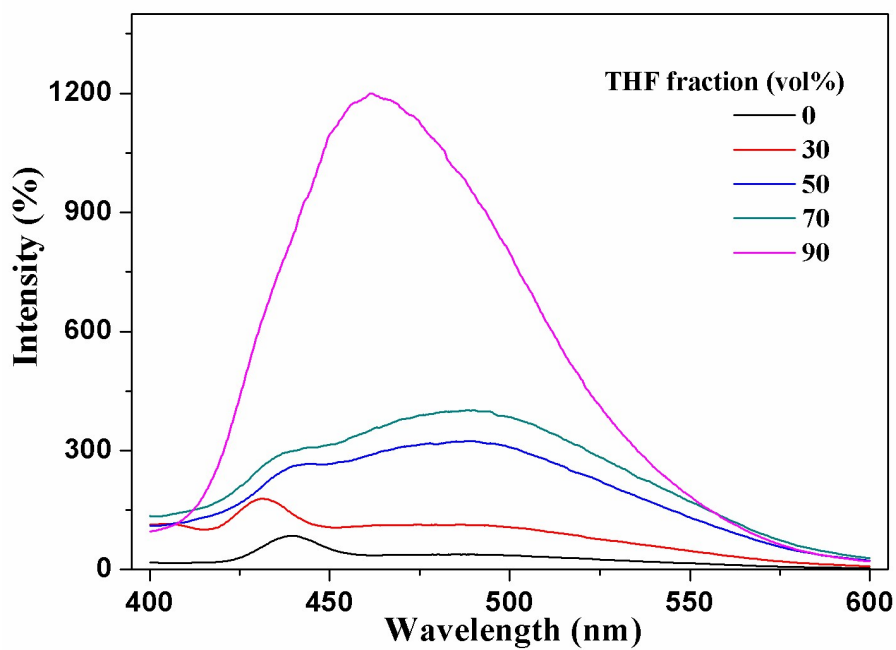

**Fig. S2** PL spectra of TPEI-C8 (50  $\mu\text{M}$ ) in MeOH and MeOH/THF mixtures. Excitation wavelength: 330 nm.

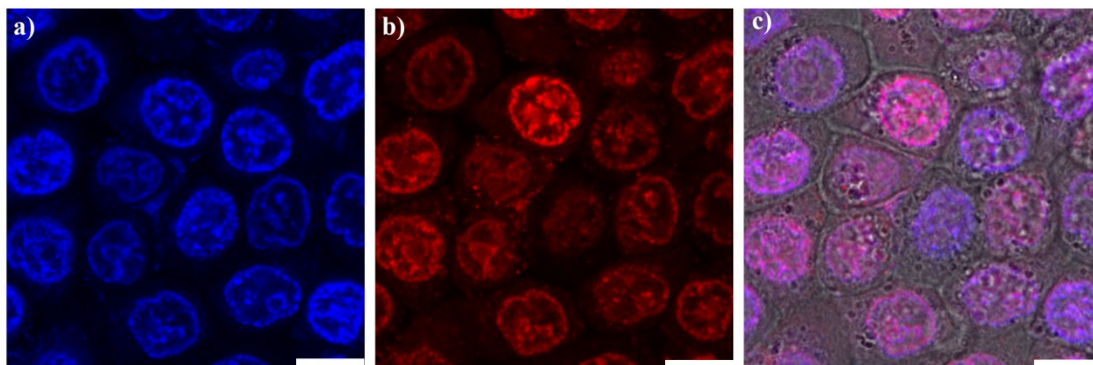

**Fig. S3** Co-staining of HeLa cells with **TPEI-C8** and Reddot1: (a) **TPEI-C8** (50  $\mu\text{M}$ ) for 4 h ( $\lambda_{\text{ex}} = 405 \text{ nm}$ ,  $\lambda_{\text{em}} = 420\text{--}470 \text{ nm}$ ); (b) **Reddot1** for 5 min ( $\lambda_{\text{ex}} = 633 \text{ nm}$ ,  $\lambda_{\text{em}} = 650\text{--}670 \text{ nm}$ ); (c) panels (a) and (b) merged; and (d) bright-field image. Scale bar: 25  $\mu\text{m}$ .

$^1\text{H}$  and  $^{13}\text{C}$  NMR spectra of **TPEI-C6**, **TPEI-C8** and **TPEI-C8**.

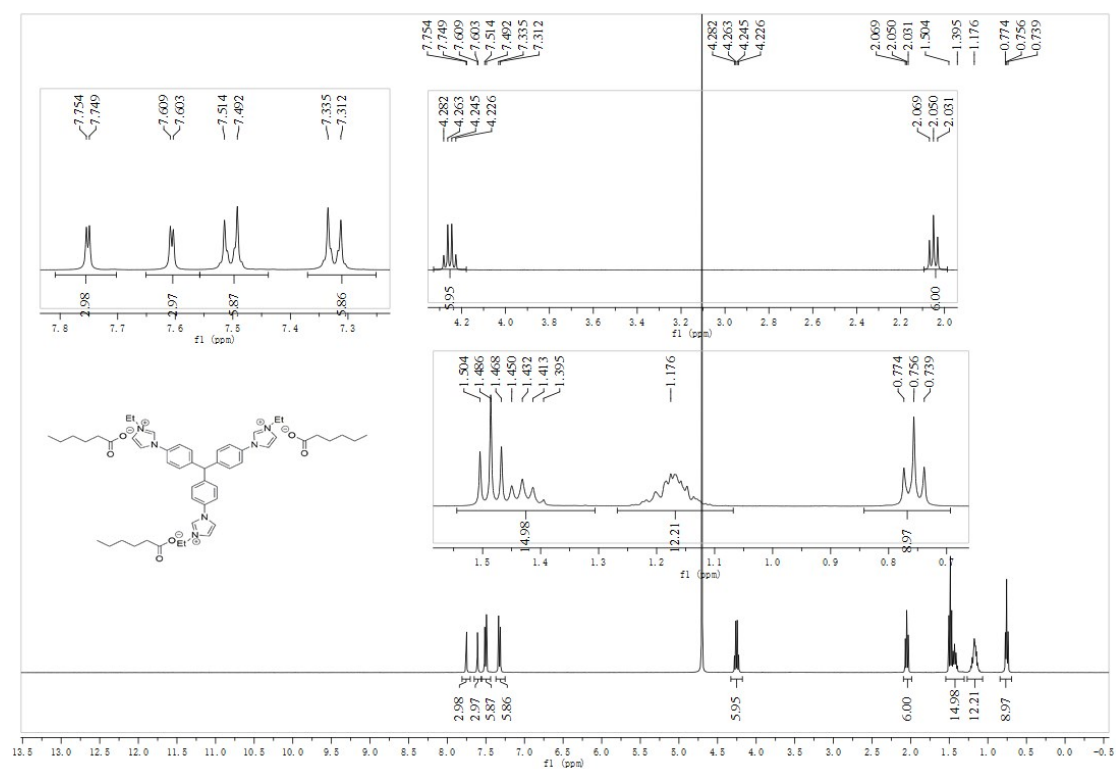

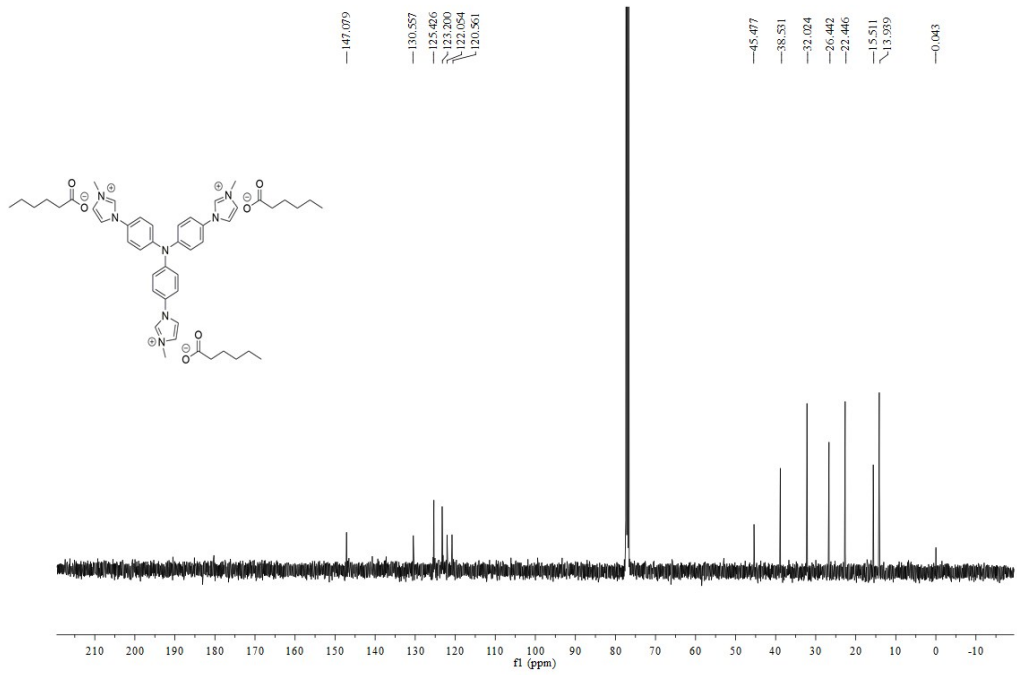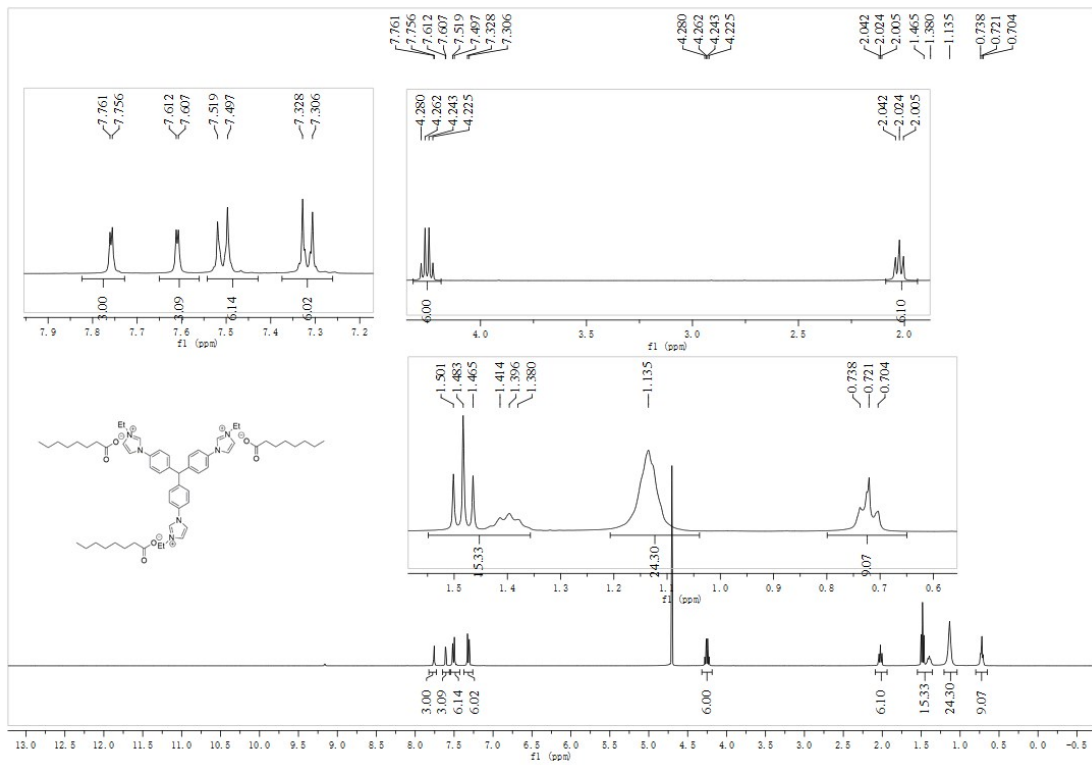

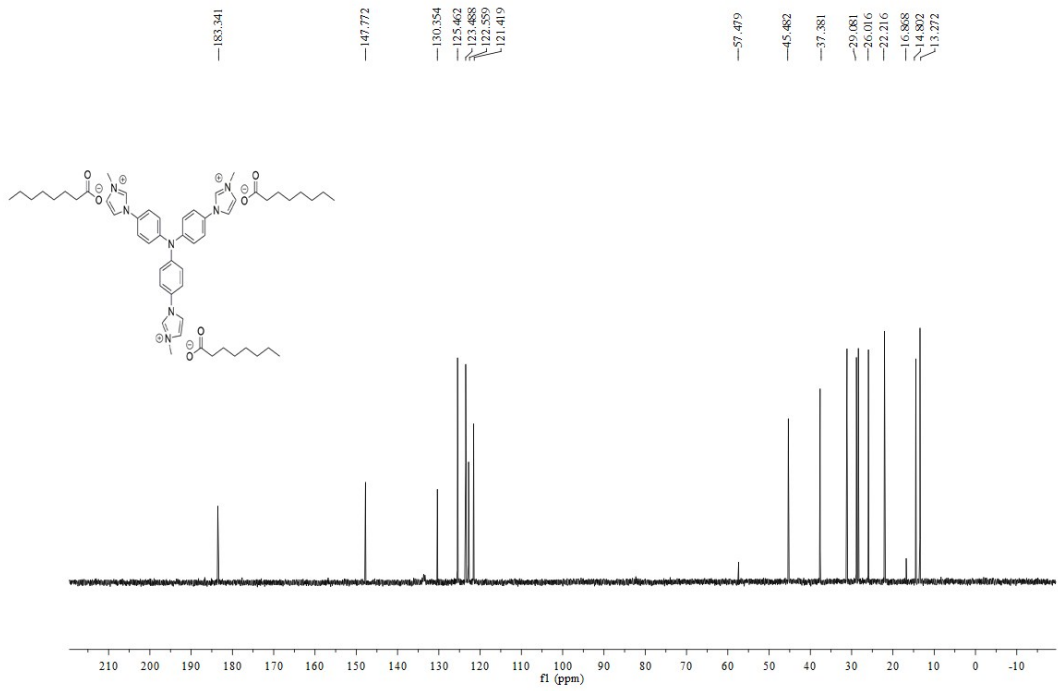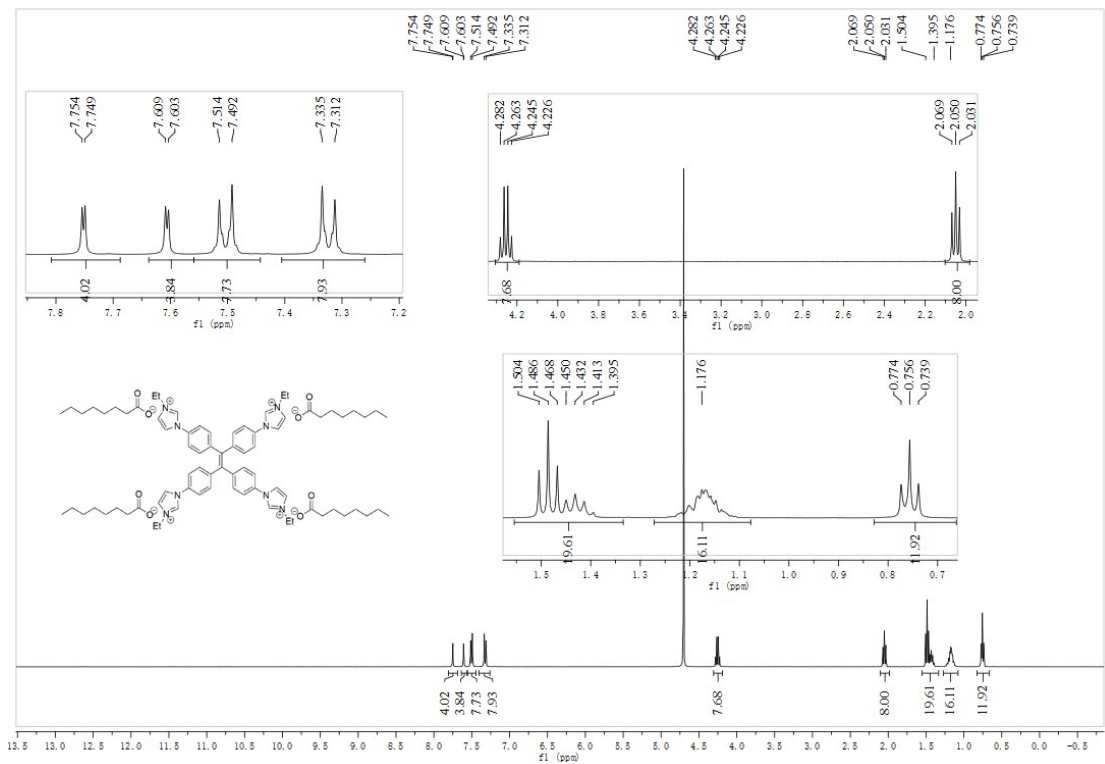

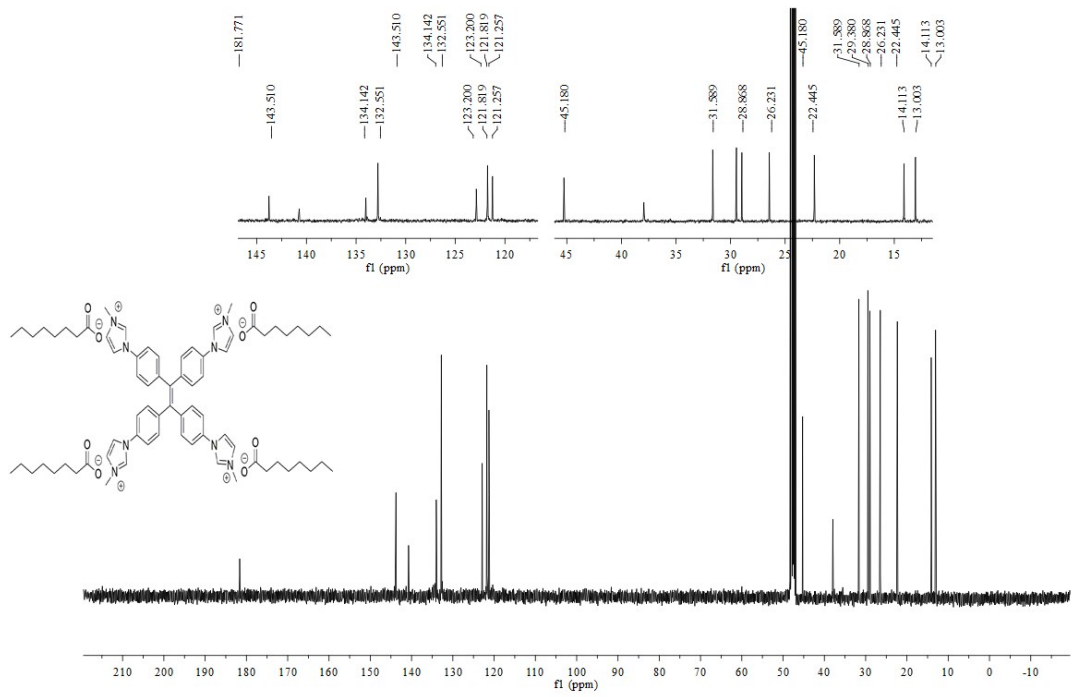

Supplement: c8nj01503a1.pdf [file c8nj01503a1.pdf]
